# Supplementary material for: SNP- and Haplotype-Based GWAS of Flowering-Related Traits in Brassica napus
Source: MDPI journal article supplement (doi:10.3390/plants10112475), 2021-11-16
Supplement: s1 [file s1]

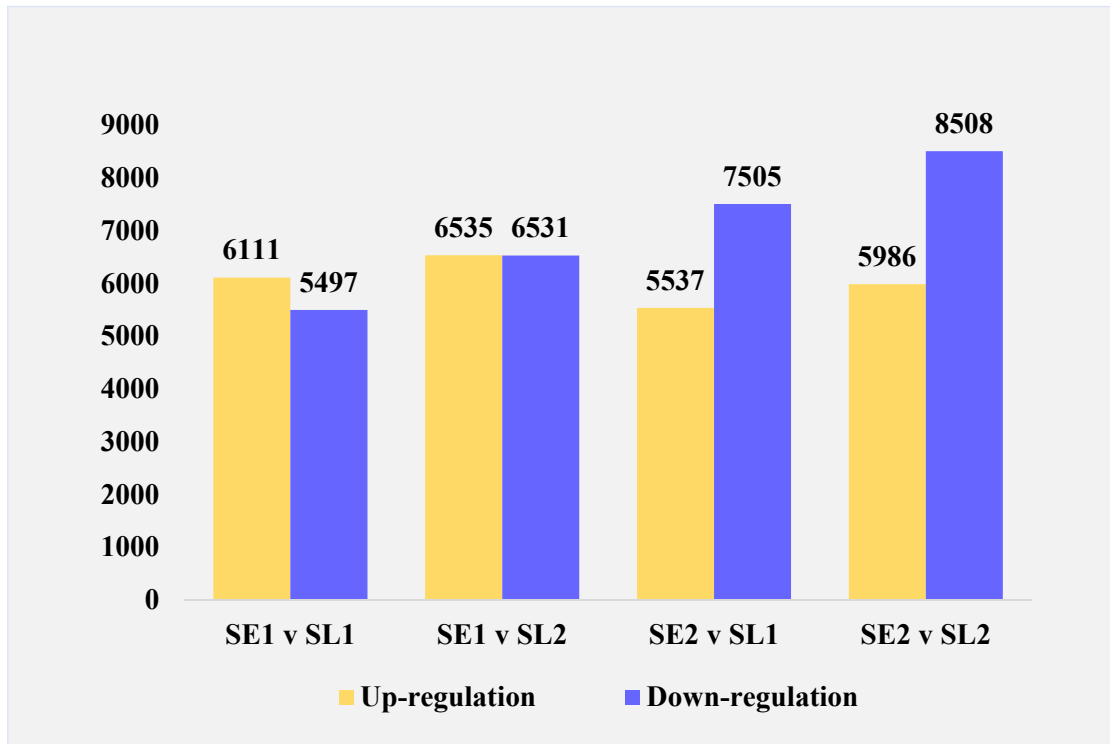

**Figure S1. Total number of DEGs (up and down regulation) between early and late flowering samples**

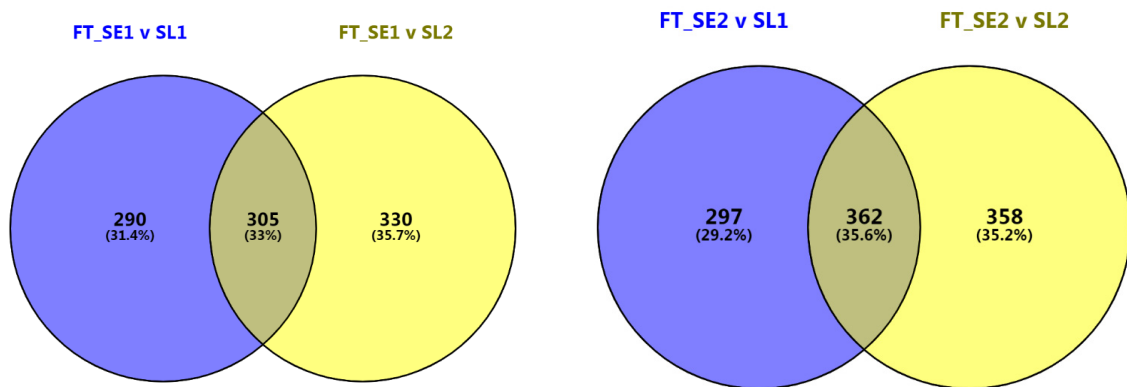

**Figure S2. The statistics of DEGs related to flowering time of four samples shown in Venn diagram**
